# Supplementary material for: Comparative analysis of Notch1 and Notch2 binding sites in the genome of BxPC3 pancreatic cancer cells
Source: PubMed Central journal article supplement — J Cancer. 2017 Jan 1;8(1):65–73. doi: 10.7150/jca.16739 (PMC5264041; doi:10.7150/jca.16739), 2017-01-01

## Supporting Information

Figure S1: Expression of FLAG-tagged Notch1, Notch2 NICD and CSL in BxPC3 pancreatic cancer cells. BxPC3 cells were transfected with the expression plasmids. Two days after transfection, FLAG-tagged Notch1 NICD, Notch2 NICD and CSL in the cell lysates were detected by Western blotting with anti-FLAG antibody. (TIF)

Figure S2: Screenshot of genome browse for genes HCRTR1.

Figure S3: The KEGG cancer pathway and Notch1 target genes. Notch1 target genes were imported into the KEGG and extracted the KEGG “cancer pathway” as a significant pathway, as listed in Table 2. Notch1 target genes are highlighted in red. (TIF)

Figure S4: The KEGG cancer pathway and Notch2 target genes. Notch2 target genes were imported into the KEGG and extracted the KEGG “cancer pathway” as a significant pathway, as listed in Table 3. Notch1 target genes are highlighted in red. (TIF)

Figure S1

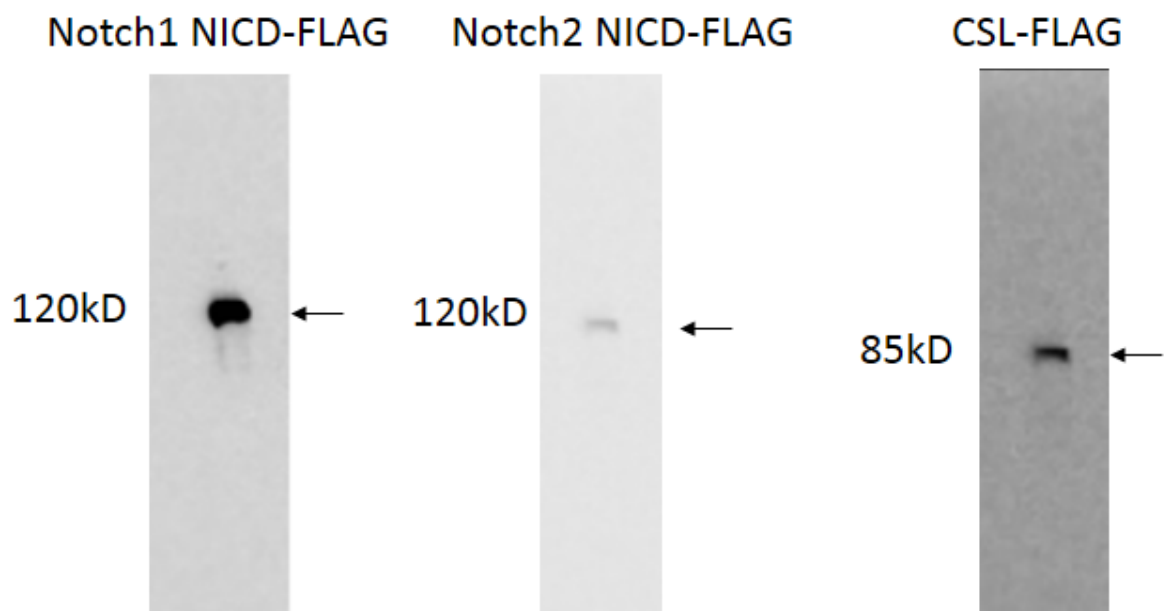

Figure S2

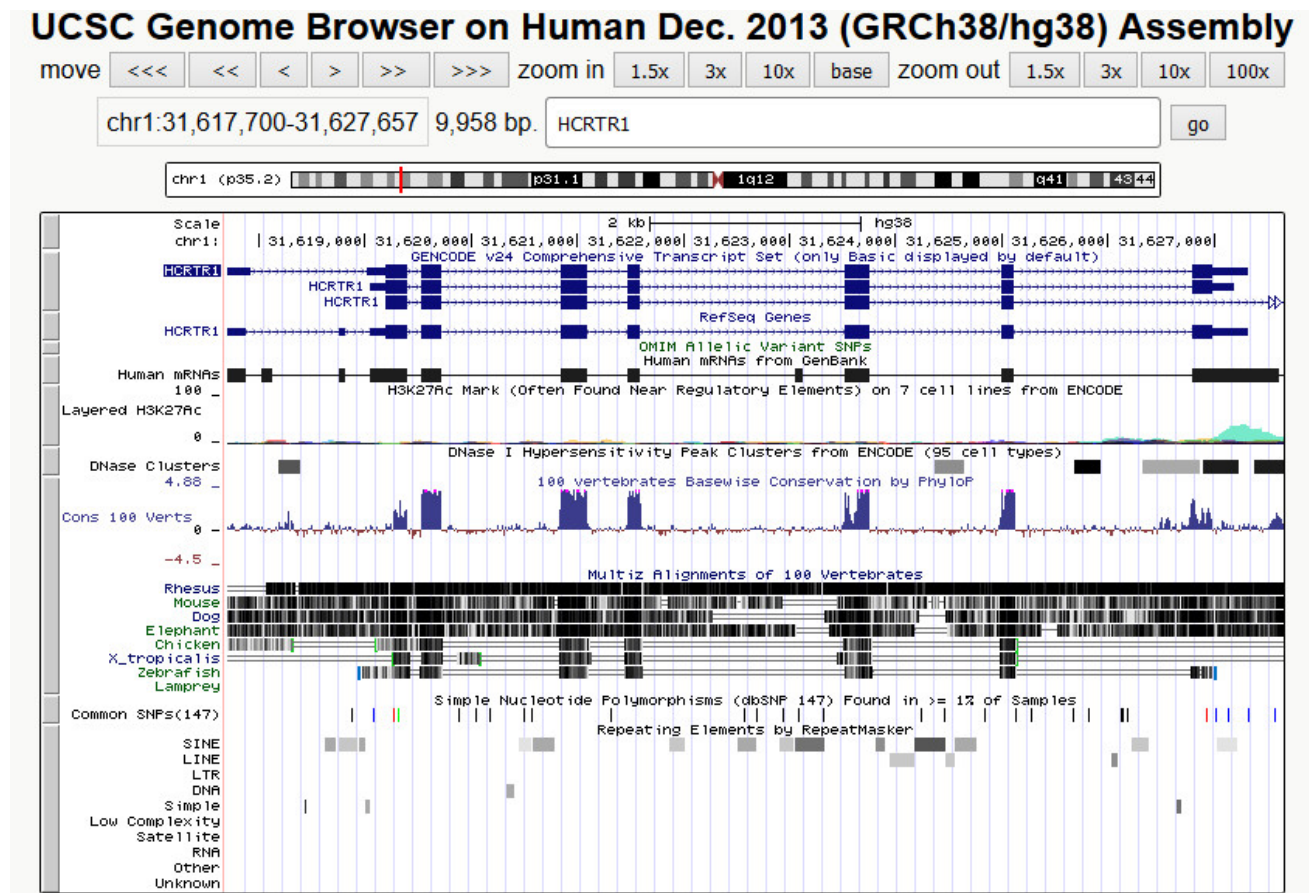

Figure S3

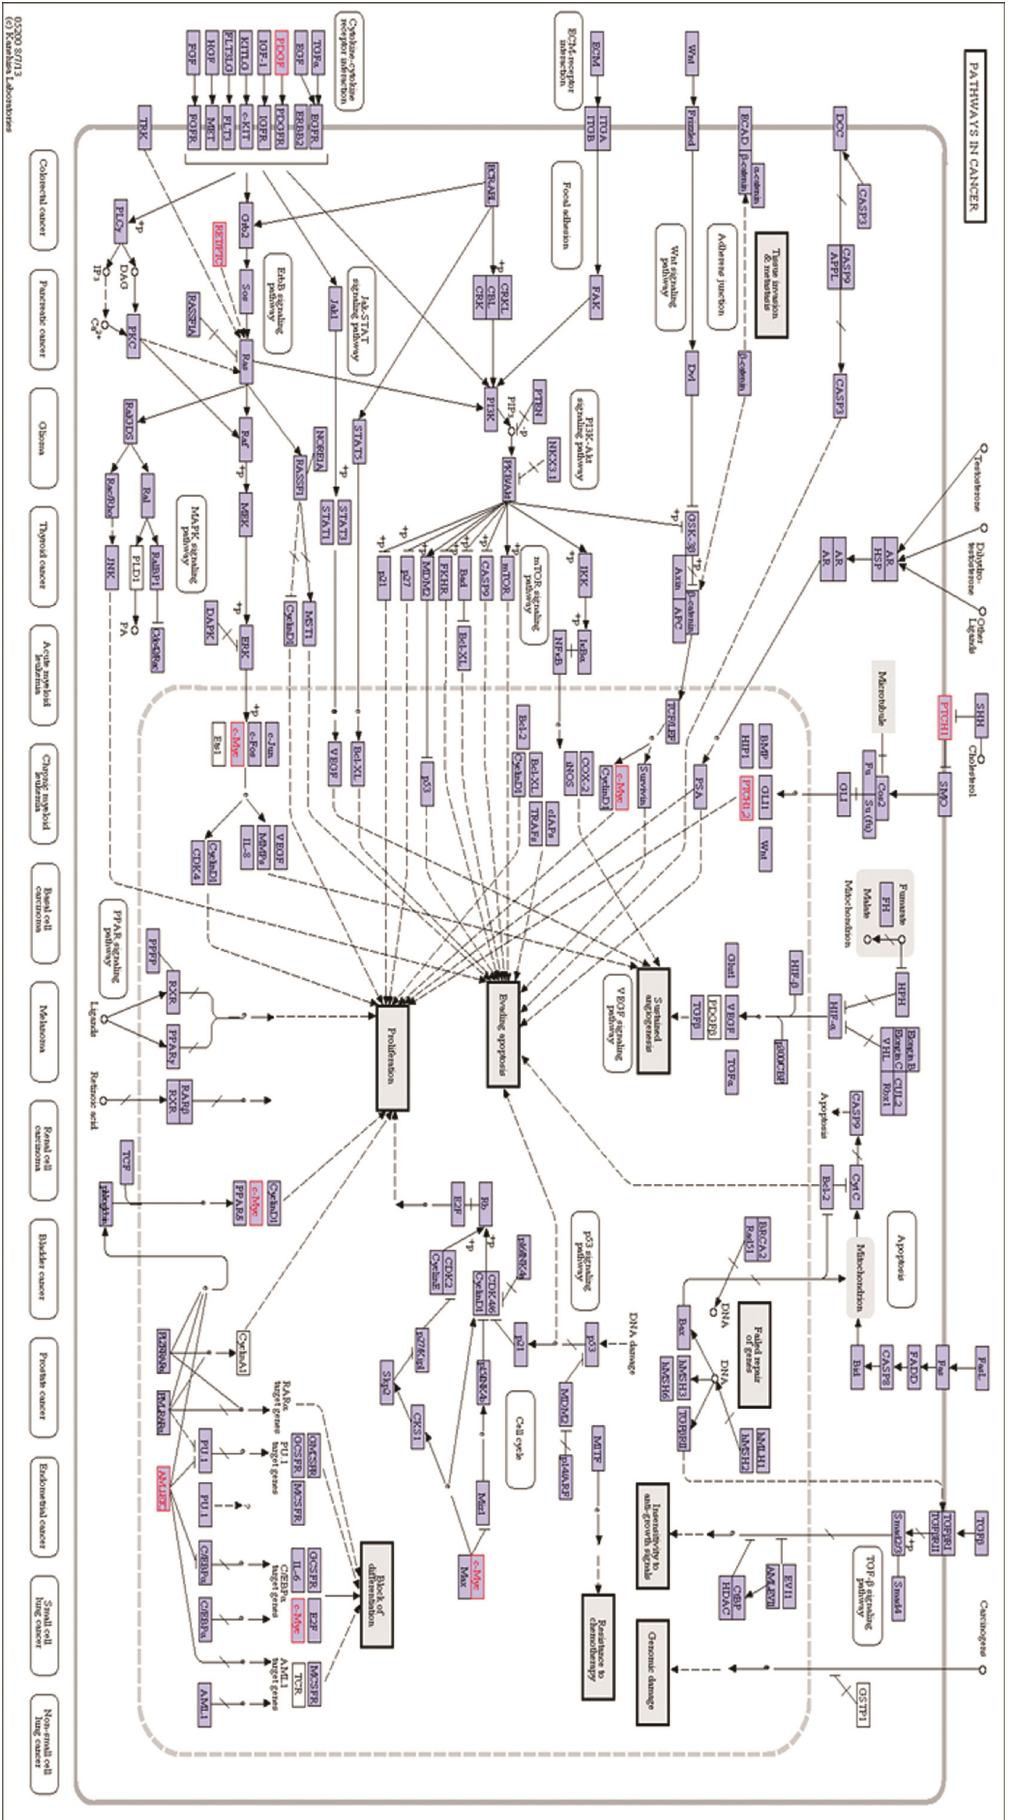

Supplement: jcav08p0065s1.pdf [file jcav08p0065s1.pdf]
